# Supplementary material for: Temporal Trends in Electrolyte and Acid-Base Imbalance Mortality in the U.S. (1999- 2020): A Longitudinal Analysis
Source: Research Square preprint supplement (doi:10.21203/rs.3.rs-6846811/v1), 2025-07-01
Supplement: Supplementary file 1 [file a37e5d3a74bfbc7e5d81e4a7.docx]

**SUPPLEMENTARY MATERIALS:**

**Supplemental Table 1:** Electrolyte and Acid-Base imbalance–related Deaths - Overall, Sex and Race, in the United States, 1999 to 2020 (NH: Non-Hispanic).

**Supplemental Table 2:** Number of deaths stratified by place of death from 1999 to 2020.

**Supplemental Table 3:** Overall and Sex‐Stratified Electrolyte Imbalance–related AAMRs per 100,000 in All Ages in the United States, 1999 to 2020
**Supplemental table 4:** Annual percent changes (APCs) of electrolyte and acid-base imbalances related Age Adjusted Mortality rates per 100,000 in groups of all ages in the United States, 1999 to 2020 – overall, sex and race.
**Supplemental Table 5:** Electrolyte and Acid Base–related AAMRs per 100,000, Stratified by Race in the United States, 1999 to 2020
**Supplemental table 6**: Electrolyte and acid-base imbalances AAMRs per 100,000 stratified by census regions in groups of all ages in the United States, 1999 -2020.
**Supplemental Table 7:** Electrolyte and Acid Base–related AAMRs per 100,000, Stratified by Urban-Rural Classification in the United States, 1999 to 2020
**Supplemental Table 8:** Electrolyte and Acid Base–related AAMRs per 100,000, Stratified by EABI subcategories from 1999 to 2020

**Supplementary Table 9:** Electrolyte and Acid Base–related AAMRs per 100,000, Stratified by EABI underlying cause of death from 1999 to 2020

**Supplemental Table 10:** Electrolyte and Acid Base–related CMRs per 100,000, Stratified by Ten Year Age Groups from 1999 to 2020.

**Supplemental Table 1:** Electrolyte and Acid-Base imbalance–related Deaths - Overall, Sex and Race, in the United States, 1999 to 2020 (NH, non-Hispanic).

|  | **Deaths** | | | | | | | | |
| --- | --- | --- | --- | --- | --- | --- | --- | --- | --- |
| **Year** | **Overall** | **Women** | **Men** | **NH White** | **NH**  **Black or African American** | **NH Asian or Pacific Islander** | **NH American Indian or Alaskan Native** | **Hispanic or Latino** | **Population** |
| 1999 | 21522 | 12211 | 9311 | 16515 | 3404 | 390 | 124 | 1008 | 279040168 |
| 2000 | 21247 | 12094 | 9153 | 16376 | 3322 | 349 | 113 | 1023 | 281421906 |
| 2001 | 21162 | 12021 | 9141 | 16305 | 3292 | 315 | 120 | 1060 | 284968955 |
| 2002 | 20985 | 11918 | 9067 | 16102 | 3185 | 425 | 119 | 1087 | 287625193 |
| 2003 | 20061 | 11278 | 8783 | 15337 | 3136 | 379 | 125 | 1038 | 290107933 |
| 2004 | 19068 | 10646 | 8422 | 14571 | 2877 | 373 | 136 | 1070 | 292805298 |
| 2005 | 20155 | 11339 | 8816 | 15343 | 3073 | 421 | 149 | 1126 | 295516599 |
| 2006 | 19886 | 11216 | 8670 | 15032 | 3012 | 444 | 151 | 1202 | 298379912 |
| 2007 | 19520 | 10783 | 8737 | 14755 | 2919 | 450 | 142 | 1228 | 301231207 |
| 2008 | 20696 | 11409 | 9287 | 15785 | 2971 | 480 | 165 | 1259 | 304093966 |
| 2009 | 20928 | 11277 | 9651 | 15705 | 3101 | 535 | 170 | 1375 | 306771529 |
| 2010 | 22035 | 12118 | 9917 | 16556 | 3204 | 510 | 196 | 1512 | 308745538 |
| 2011 | 23811 | 12877 | 10934 | 17893 | 3363 | 610 | 199 | 1700 | 311591917 |
| 2012 | 25221 | 13514 | 11707 | 18851 | 3599 | 628 | 207 | 1841 | 313914040 |
| 2013 | 26900 | 14422 | 12478 | 19836 | 4000 | 721 | 233 | 2030 | 316128839 |
| 2014 | 28600 | 15373 | 13227 | 21049 | 4254 | 756 | 257 | 2203 | 318857056 |
| 2015 | 31175 | 16459 | 14716 | 22910 | 4543 | 819 | 307 | 2472 | 321418820 |
| 2016 | 32813 | 17285 | 15528 | 23826 | 4913 | 972 | 356 | 2639 | 323127513 |
| 2017 | 35786 | 18824 | 16962 | 25861 | 5375 | 1113 | 338 | 2985 | 325719178 |
| 2018 | 38308 | 19866 | 18442 | 27640 | 5664 | 1265 | 344 | 3303 | 327167434 |
| 2019 | 40243 | 20767 | 19476 | 28633 | 6097 | 1357 | 397 | 3665 | 328239523 |
| 2020 | 50116 | 25061 | 25055 | 34243 | 7949 | 1687 | 561 | 5554 | 329484123 |
| **Total** | 580238 | 312758 | 267480 | 429124 | 87253 | 14999 | 4909 | 42380 | 6746356647 |

**Supplemental Table 2:** Number of deaths stratified by place of death from 1999 to 2020.

|  | **Deaths** | | | |
| --- | --- | --- | --- | --- |
| **Year** | **Medical Facility** | **Nursing Home/Long-term Care Facility** | **Hospices** | **Home** |
| 1999 | 15683 | 3889 | Missing | 1653 |
| 2000 | 15288 | 4112 | Missing | 1590 |
| 2001 | 15221 | 3967 | Missing | 1667 |
| 2002 | 15075 | 3888 | Missing | 1691 |
| 2003 | 14765 | 3296 | 16 | 1613 |
| 2004 | 14116 | 2939 | 21 | 1626 |
| 2005 | 14794 | 3102 | 74 | 1792 |
| 2006 | 14694 | 2932 | 141 | 1765 |
| 2007 | 14523 | 2788 | 138 | 1725 |
| 2008 | 15287 | 2834 | 191 | 1749 |
| 2009 | 15357 | 2627 | 216 | 1874 |
| 2010 | 16444 | 2762 | 295 | 2090 |
| 2011 | 17884 | 2862 | 353 | 2271 |
| 2012 | 18803 | 3042 | 527 | 2398 |
| 2013 | 20247 | 3083 | 523 | 2542 |
| 2014 | 21809 | 3211 | 502 | 2625 |
| 2015 | 23939 | 3425 | 643 | 2764 |
| 2016 | 25360 | 3435 | 673 | 2915 |
| 2017 | 27473 | 3632 | 821 | 3323 |
| 2018 | 29328 | 3814 | 836 | 3732 |
| 2019 | 31220 | 3477 | 992 | 3911 |
| 2020 | 38391 | 4166 | 1279 | 5376 |
| **Total** | 435701 | 73283 | 8241 | 52692 |

**Supplemental Table 3:** Overall and Sex‐Stratified Electrolyte Imbalance–related AAMRs per 100,000 in All Ages in the United States, 1999 to 2020

|  | **Age-Adjusted Rate (95% CI)** | | | |
| --- | --- | --- | --- | --- |
| **Year** | **Men** | **Women** | | **Overall** |
| 1999 | 8.56 (8.38 – 8.74) | 7.32 (7.19 - 7.45) | | 7.88 (7.78 – 7.99) |
| 2000 | 8.32 (8.15 – 8.50) | 7.16 (7.03 – 7.28) | | 7.70 (7.60 – 7.81) |
| 2001 | 8.10 (7.93 – 8.27) | 7.01 (6.88 - 7.14) | | 7.53 (7.42 – 7.63) |
| 2002 | 7.92 (7.76 – 8.09) | 6.89 (6.77 – 7.02) | | 7.36 (7.26 – 7.46) |
| 2003 | 7.45 (7.29 – 7.61) | 6.46 (6.34 - 6.58) | | 6.91 (6.82 – 7.01) |
| 2004 | 6.99 (6.84 - 7.14) | 6.03 (5.91 - 6.14) | | 6.45 (6.36 – 6.54) |
| 2005 | 7.12 (6.97 – 7.27) | 6.34 (6.22 - 6.45) | | 6.71 (6.62 – 6.80) |
| 2006 | 6.79 (6.64 – 6.93) | 6.17 (6.05 – 6.28) | | 6.47 (6.38 – 6.56) |
| 2007 | 6.70 (6.55 – 6.84) | 5.83 (5.72 – 5.94) | | 6.21 (6.13 – 6.30) |
| 2008 | 6.93 (6.78 – 7.07) | 6.07 (5.95 – 6.18) | | 6.48 (6.39 – 6.57) |
| 2009 | 7.05 (6.91 – 7.20) | 5.90 (5.79 – 6.01) | | 6.43 (6.35 – 6.52) |
| 2010 | 7.10 (6.96 – 7.24) | 6.26 (6.15 – 6.38) | | 6.63 (6.55 – 6.72) |
| 2011 | 7.57 (7.42 – 7.71) | 6.52 (6.41 - 6.64) | | 7.01 (6.92 – 7.10) |
| 2012 | 7.86 (7.72 – 8.01) | 6.70 (6.58 – 6.81) | | 7.24 (7.15 – 7.65) |
| 2013 | 8.16 (8.02 – 8.31) | 7.04 (6.93 – 7.16) | | 7.56 (7.47 -7.65) |
| 2014 | 8.42 (8.27 – 8.56) | 7.38 (7.26 – 7.49) | | 7.86 (7.76 – 7.95) |
| 2015 | 9.09 (8.94 – 9.24) | 7.75 (7.63 – 7.87) | | 8.36 (8.27 – 8.45) |
| 2016 | 9.39 (9.24 – 9.54) | 8.02 (7.90 – 8.15) | | 8.65 (8.56 – 8.75) |
| 2017 | 10.01 (9.85 – 10.16) | 8.57 (8.45 – 8.70) | | 9.25 (9.15 -9.34) |
| 2018 | 10.61 (10.46 – 10.77) | 8.91 (8.79 – 9.04) | | 9.70 (9.60 – 9.80) |
| 2019 | 10.95 (10.79 – 11.10) | 9.17 (9.05 – 9.30) | | 9.98 (9.89 – 10.08) |
| 2020 | 13.85 (13.68 – 14.03) | | 10.93 (10.79 – 11.07) | 12.25 (12.14 -12.36) |

**Supplemental table 4:** Annual percent changes (APCs) of electrolyte and acid-base imbalances related Age Adjusted Mortality rates per 100,000 in groups of all ages in the United States, 1999 to 2020 – overall, sex and race.

| **YEAR INTERVAL** | **APC(95% CI)** |
| --- | --- |
| 1999-2008 | -2.73(-3.18 to -2.27) |
| 2008-2018 | 4.44(4.00 to 4.89) |
| 2018-2020 | 12.08(7.93 to 16.38) |
| **MEN** |  |
| 1999-2007 | -3.49(-4.17 to -2.79) |
| 2007-2018 | 4.16(3.71 to 4.61) |
| 2018-2020 | 15.12(10.35 to 20.09) |
| **WOMEN** |  |
| 1999-2008 | -2.63(-3.18 to -2.08) |
| 2008-2018 | 4.29(3.77 to 4.80) |
| 2018-2020 | 10.58(5.72 to 15.65) |
| **HISPANIC OR LATINO** |  |
| 1999-2007 | -3.46(-4.63 to -2.27) |
| 2007-2018 | 3.98(3.31 to 4.63) |
| 2018-2020 | 25.7(19.14 to 32.60) |
| **NH WHITE** |  |
| 1999-2007 | -3.07(-3.83 to -2.30) |
| 2007-2018 | 4.20 (3.66 to 4.73) |
| 2018-2020 | 11.31(5.73 to 17.16) |
| **NH AMERICAN INDIAN OR ALASKA NATIVE** |  |
| 1999-2018 | 2.79(1.95 to 3.62) |
| 2018-2020 | 21.45(2.58 to 43.78) |
| **NH ASIAN OR PACIFIC ISLANDER** |  |
| 1999-2004 | -5.63( -10.67 to -0.30) |
| 2004-2015 | 0.99(-0.56 to 2.57) |
| 2015-2020 | 9.19(6.03 to 12.43) |
| **NH BLACK OR AFRICAN AMERICAN** |  |
| 1999-2008 | -4.02(-4.60 to -3.42) |
| 2008-2018 | 3.59(3.02 to 4.15) |
| 2018-2020 | 15.52(10.38 to 20.89) |
| **METROPOLITAN** |  |
| 1999-2008 | -2.86(-3.40 to -2.31) |
| 2008-2018 | 4.49(3.99 to 4.99) |
| 2018-2020 | 12.03(7.71 to 16.52) |
| **NON-METROPOLITAN** |  |
| 1999-2007 | -2.42(-3.23 to -1.62) |
| 2007-2018 | 4.05(3.49 to 4.62) |
| 2018-2020 | 14.01(7.90 to 20.48) |

**Supplemental Table 5** Electrolyte and Acid Base–related AAMRs per 100,000, Stratified by Race in the United States, 1999 to 2020

| **Year** | **NH American Indian Or Alaska Native** | **NH Asian Or Pacific Islander** | **NH Black Or African American** | **NH White** | **Hispanic Or Latino** |
| --- | --- | --- | --- | --- | --- |
| **1999** | 10.08 (8.13 - 12.02) | 6.40 (5.73 - 7.08) | 14.14 (13.65 - 14.62) | 7.24 (7.13 - 7.35) | 7.0 (6.5 - 7.4) |
| **2000** | 8.66 (6.95 - 10.37) | 5.41 (4.81 - 6.01) | 13.69 (13.21 - 14.16) | 7.12 (7.01 - 7.23) | 6.9 (6.4 - 7.4) |
| **2001** | 8.82 (7.10 - 10.54) | 4.43 (3.91 - 4.95) | 13.38 (12.91 - 13.85) | 6.99 (6.88 - 7.10) | 6.5 (6.1 - 7.0) |
| **2002** | 8.50 (6.83 - 10.17) | 5.68 (5.12 - 6.25) | 12.82 (12.36 - 13.27) | 6.83 (6.73 - 6.94) | 6.5 (6.1 - 6.9) |
| **2003** | 8.85 (7.15 - 10.54) | 4.69 (4.20 - 5.19) | 12.26 (11.82 - 12.70) | 6.42 (6.32 - 6.53) | 5.6 (5.2 - 5.9) |
| **2004** | 9.60  (7.86 - 11.35) | 4.40 (3.93 - 4.87) | 11.06  (10.64 - 11.47) | 6.06 (5.96 - 6.16) | 5.5 (5.2 - 5.9) |
| **2005** | 10.36 (8.55 - 12.16) | 4.74 (4.27 - 5.21) | 11.46 (11.04 - 11.87) | 6.28 (6.18 - 6.38) | 5.5 (5.1 - 5.8) |
| **2006** | 9.37 (7.73 - 11.00) | 4.78 (4.32 - 5.24) | 10.94 (10.54 - 11.34) | 6.05 (5.95 - 6.15) | 5.6 (5.3 - 6.0) |
| **2007** | 9.11 (7.49 - 10.73) | 4.45 (4.03 - 4.88) | 10.33 (9.94 - 10.71) | 5.85 (5.76 - 5.95) | 5.5 (5.1 - 5.8) |
| **2008** | 10.04 (8.38 - 11.69) | 4.56 (4.14 - 4.98) | 10.23 (9.85 - 10.61) | 6.18 (6.08 - 6.28) | 5.3 (4.9 - 5.6) |
| **2009** | 9.39 (7.86 - 10.92) | 4.77 (4.35 - 5.19) | 10.30 (9.92 - 10.67) | 6.07 (5.97 - 6.17) | 5.5 (5.2 - 5.9) |
| **2010** | 10.66 (9.05 - 12.27) | 4.31 (3.92 - 4.70) | 10.49 (10.11 - 10.86) | 6.28 (6.18 - 6.38) | 6.0 (5.6 - 6.3) |
| **2011** | 10.60 (9.03 - 12.18) | 4.89 (4.49 - 5.28) | 10.66 (10.29 - 11.03) | 6.68 (6.58 - 6.78) | 6.3 (6.0 - 6.6) |
| **2012** | 10.52 (9.00 - 12.04) | 4.69 (4.32 - 5.07) | 11.02 (10.65 - 11.39) | 6.93 (6.83 - 7.03) | 6.4 (6.1 - 6.7) |
| **2013** | 10.92 (9.43 - 12.40) | 5.09 (4.71 - 5.46) | 11.78 (11.41 - 12.16) | 7.22 (7.11 - 7.32) | 6.7 (6.4 - 7.0) |
| **2014** | 11.55 (10.06 - 13.03) | 4.90 (4.54 - 5.25) | 12.24 (11.86 - 12.62) | 7.50 (7.40 - 7.60) | 6.8 (6.5 - 7.1) |
| **2015** | 13.37 (11.80 - 14.94) | 4.96 (4.62 - 5.31) | 12.56 (12.18 - 12.94) | 8.04 (7.94 - 8.15) | 7.3 (7.0 - 7.6) |
| **2016** | 14.89 (13.28 - 16.50) | 5.58 (5.22 - 5.94) | 13.24 (12.86 - 13.62) | 8.29 (8.18 - 8.40) | 7.3 (7.0 - 7.6) |
| **2017** | 14.08 (12.52 - 15.65) | 6.03 (5.67 - 6.39) | 14.11 (13.72 - 14.50) | 8.85 (8.74 - 8.96) | 7.9 (7.6 - 8.2) |
| **2018** | 13.85 (12.34 - 15.37) | 6.52 (6.16 - 6.88) | 14.40 (14.02 - 14.79) | 9.32 (9.21 - 9.43) | 8.4 (8.1 - 8.7) |
| **2019** | 15.37 (13.81 - 16.93) | 6.73 (6.37 - 7.09) | 15.11 (14.72 - 15.49) | 9.54 (9.43 - 9.66) | 9.0 (8.7 - 9.3) |
| **2020** | 20.72 (18.95 - 22.48) | 7.96 (7.58 - 8.34) | 19.31 (18.87 - 19.74) | 11.36 (11.23 - 11.48) | 13.2 (12.8 - 13.5) |
| **OVERALL** | **11.71 (11.36-12.06)** | **5.45( 5.37-5.54)** | **12.70( 12.61-12.79)** | **7.41( 7.39-7.43)** | **7.2(7.2-7.3)** |

**Supplemental table 6**: Electrolyte and acid-base imbalances AAMRs per 100,000 stratified by census regions in groups of all ages in the United States, 1999 -2020.

| **Census region** | **Year** | **Age Adjusted Rate(95% CI)** |
| --- | --- | --- |
| South | 1999 | 8.42(8.23-8.6) |
| South | 2000 | 8.29(8.11-8.47) |
| South | 2001 | 8.15(7.97-8.33) |
| South | 2002 | 7.93(7.75-8.1) |
| South | 2003 | 7.51(7.34-7.68) |
| South | 2004 | 6.91(6.75-7.07) |
| South | 2005 | 7.34(7.17-7.5) |
| South | 2006 | 7.18(7.02-7.34) |
| South | 2007 | 6.78(6.63-6.94) |
| South | 2008 | 7.19(7.04-7.35) |
| South | 2009 | 7.27(7.12-7.43) |
| South | 2010 | 7.6(7.44-7.75) |
| South | 2011 | 7.82(7.67-7.98) |
| South | 2012 | 8.25(8.09-8.41) |
| South | 2013 | 8.7(8.54-8.86) |
| South | 2014 | 8.88(8.72-9.04) |
| South | 2015 | 9.44(9.28-9.61) |
| South | 2016 | 9.61(9.45-9.78) |
| South | 2017 | 10.02(9.85-10.18) |
| South | 2018 | 10.58(10.41-10.75) |
| South | 2019 | 10.81(10.64-10.97) |
| South | 2020 | 13.3(13.11-13.48) |
| **South** | **TOTAL** | **8.70(8.67-8.74)** |
| West | 1999 | 6.79(6.57-7.01) |
| West | 2000 | 6.4(6.19-6.61) |
| West | 2001 | 6.47(6.26-6.67) |
| West | 2002 | 6.38(6.17-6.58) |
| West | 2003 | 5.78(5.58-5.97) |
| West | 2004 | 5.7(5.51-5.89) |
| West | 2005 | 5.66(5.47-5.85) |
| West | 2006 | 5.72(5.53-5.9) |
| West | 2007 | 5.47(5.29-5.65) |
| West | 2008 | 5.67(5.49-5.85) |
| West | 2009 | 5.55(5.37-5.72) |
| West | 2010 | 5.67(5.5-5.85) |
| West | 2011 | 6.03(5.85-6.21) |
| West | 2012 | 6.16(5.98-6.34) |
| West | 2013 | 6.55(6.37-6.73) |
| West | 2014 | 6.78(6.6-6.96) |
| West | 2015 | 7.38(7.19-7.56) |
| West | 2016 | 7.79(7.6-7.99) |
| West | 2017 | 8.81(8.61-9.01) |
| West | 2018 | 9.2(9-9.41) |
| West | 2019 | 9.6(9.39-9.8) |
| West | 2020 | 11.66(11.44-11.88) |
| **West** | **TOTAL** | **7.06(7.01-7.10)** |
| Mid-west | 1999 | 8.48(8.26-8.71) |
| Mid-west | 2000 | 7.9(7.69-8.12) |
| Mid-west | 2001 | 7.8(7.59-8.02) |
| Mid-west | 2002 | 7.59(7.38-7.8) |
| Mid-west | 2003 | 7.21(7.01-7.41) |
| Mid-west | 2004 | 6.8(6.61-7) |
| Mid-west | 2005 | 6.96(6.76-7.16) |
| Mid-west | 2006 | 6.6(6.41-6.79) |
| Mid-west | 2007 | 6.5(6.31-6.68) |
| Mid-west | 2008 | 6.5(6.32-6.69) |
| Mid-west | 2009 | 6.47(6.28-6.65) |
| Mid-west | 2010 | 6.32(6.14-6.5) |
| Mid-west | 2011 | 6.96(6.77-7.15) |
| Mid-west | 2012 | 7.07(6.88-7.26) |
| Mid-west | 2013 | 7.32(7.13-7.51) |
| Mid-west | 2014 | 7.55(7.36-7.74) |
| Mid-west | 2015 | 8.15(7.95-8.35) |
| Mid-west | 2016 | 8.42(8.22-8.62) |
| Mid-west | 2017 | 9.06(8.85-9.26) |
| Mid-west | 2018 | 9.24(9.04-9.45) |
| Mid-west | 2019 | 9.49(9.28-9.7) |
| Mid-west | 2020 | 11.21(10.98-11.44) |
| **Mid-west** | **TOTAL** | **7.78(7.73-7.82)** |
| North-east | 1999 | 7.33(7.11-7.55) |
| North-east | 2000 | 7.63(7.4-7.85) |
| North-east | 2001 | 7.19(6.97-7.4) |
| North-east | 2002 | 7.07(6.86-7.29) |
| North-east | 2003 | 6.68(6.48-6.89) |
| North-east | 2004 | 6.09(5.9-6.29) |
| North-east | 2005 | 6.35(6.15-6.55) |
| North-east | 2006 | 5.87(5.68-6.06) |
| North-east | 2007 | 5.7(5.51-5.88) |
| North-east | 2008 | 5.98(5.79-6.17) |
| North-east | 2009 | 5.73(5.55-5.92) |
| North-east | 2010 | 6.27(6.08-6.47) |
| North-east | 2011 | 6.59(6.4-6.79) |
| North-east | 2012 | 6.71(6.52-6.91) |
| North-east | 2013 | 6.82(6.62-7.02) |
| North-east | 2014 | 7.44(7.24-7.65) |
| North-east | 2015 | 7.6(7.4-7.81) |
| North-east | 2016 | 7.98(7.77-8.2) |
| North-east | 2017 | 8.39(8.17-8.6) |
| North-east | 2018 | 8.91(8.69-9.13) |
| North-east | 2019 | 9.38(9.16-9.61) |
| North-east | 2020 | 12.08(11.83-12.33) |
| **North-east** | **TOTAL** | **7.35(7.30-7.39)** |

**Supplemental Table 7:** Electrolyte and Acid Base–related AAMRs per 100,000, Stratified by Urban-Rural Classification in the United States, 1999 to 2020

|  | **Age-Adjusted Rate (95% CI)** | |
| --- | --- | --- |
| **Year** | **Non-Metropolitan** | **Metropolitan** |
| 1999 | 9.15 (8.89 - 9.41) | 7.59 (7.48 - 7.71) |
| 2000 | 8.89 (8.63 - 9.15) | 7.41 (7.30 - 7.52) |
| 2001 | 8.82 (8.57 - 9.08) | 7.24 (7.13 - 7.35) |
| 2002 | 8.90 (8.64 - 9.15) | 7.02 (6.91 - 7.13) |
| 2003 | 8.62 (8.36 - 8.87) | 6.50 (6.40 - 6.61) |
| 2004 | 7.91 (7.67 - 8.15) | 6.15 (6.05 - 6.25) |
| 2005 | 8.25 (8.01 - 8.49) | 6.36 (6.26 - 6.46) |
| 2006 | 7.99 (7.75 - 8.22) | 6.14 (6.05 - 6.24) |
| 2007 | 7.48 (7.25 - 7.71) | 5.95 (5.86 - 6.05) |
| 2008 | 8.15 (7.91 - 8.39) | 6.13 (6.04 - 6.23) |
| 2009 | 8.26 (8.02 - 8.50) | 6.04 (5.95 - 6.14) |
| 2010 | 8.17 (7.94 - 8.41) | 6.33 (6.24 - 6.43) |
| 2011 | 8.79 (8.54 - 9.03) | 6.63 (6.53 - 6.72) |
| 2012 | 9.14 (8.90 - 9.39) | 6.84 (6.74 - 6.94) |
| 2013 | 9.49 (9.23 - 9.74) | 7.19 (7.09 - 7.28) |
| 2014 | 10.00 (9.74 - 10.25) | 7.43 (7.33 - 7.53) |
| 2015 | 10.74 (10.47 - 11.00) | 7.90 (7.80 - 8.00) |
| 2016 | 11.00 (10.73 - 11.27) | 8.21 (8.11 - 8.31) |
| 2017 | 11.55 (11.27 - 11.82) | 8.80 (8.70 - 8.91) |
| 2018 | 12.10 (11.82 - 12.37) | 9.22 (9.12 - 9.33) |
| 2019 | 12.53 (12.24 - 12.81) | 9.53 (9.43 - 9.64) |
| 2020 | 15.79 (15.48 - 16.11) | 11.61 (11.50 - 11.73) |

**Supplemental Table 8:** Electrolyte and Acid Base–related AAMRs per 100,000, Stratified by EABI subcategories from 1999 to 2020

| **Subcategory** | **Overall AAMR (95% CI)** |
| --- | --- |
| Acidosis | 2.88 (2.87-2.89) |
| Hyperkalaemia | 1.80 (1.79-1.81) |
| Hypo-osmolality and Hyponatremia | 0.91 (0.90-0.92) |
| Hyper-osmolality and Hypernatremia | 0.84 (0.83-0.85) |
| Hypokalaemia | 0.38 (0.38-0.39) |
| Fluid overload | 0.35 (0.35-0.36) |
| Alkalosis | (0.02 (0.02-0.02) |
| Other disorders of fluid and electrolyte imbalance | 1.05 (1.05-1.06) |

**Supplementary Table 9:** Electrolyte and Acid Base–related AAMRs per 100,000, Stratified by EABI underlying cause of death from 1999 to 2020

| **Underlying Cause of Death** | **Overall AAMR (95% CI)** |
| --- | --- |
| Diabetes Mellitus | 0.28 (0.28-0.29) |
| Chronic Kidney Disease | 0.28 (0.27-0.28) |
| Heart Failure | 0.13 (0.12-0.13) |
| Sepsis | 0.30 (0.30-0.31) |

**Supplemental Table 10:** Electrolyte and Acid Base–related CMRs per 100,000, Stratified by Ten Year Age Groups from 1999 to 2020.

| **Ten-Year Age Groups** | **Deaths** | **Population** | **Crude Mortality Rate (95% CI)** | **% of Total Deaths** |
| --- | --- | --- | --- | --- |
| **< 1 year** | 5617 | 86913756 | 6.46 (6.29-6.63) | 0.97% |
| **1-4 years** | 950 | 348570379 | 0.27 (0.26-0.29) | 0.16% |
| **5-14 years** | 969 | 901223301 | 0.11 (0.1-0.11) | 0.17% |
| **15-24 years** | 2708 | 935794722 | 0.29 (0.28-0.3) | 0.47% |
| **25-34 years** | 7095 | 920089469 | 0.77 (0.75-0.79) | 1.22% |
| **35-44 years** | 17085 | 931287288 | 1.83 (1.81-1.86) | 2.94% |
| **45-54 years** | 42034 | 927576220 | 4.53 (4.49-4.57) | 7.24% |
| **55-64 years** | 78795 | 766424847 | 10.28 (10.21-10.35) | 13.58% |
| **65-74 years** | 109267 | 510458341 | 21.41 (21.28-21.53) | 18.83% |
| **75-84 years** | 148977 | 298504433 | 49.91 (49.65-50.16) | 25.68% |
| **85+ years** | 166712 | 119513891 | 139.49 (138.82-140.16) | 28.73% |
